# Supplementary material
Source: PubMed Central journal article supplement (PMC363105)
Supplement: mbc_15_3_1185__1.pdf [file mbc_15_3_1185__1.pdf]

## Supplementary figure

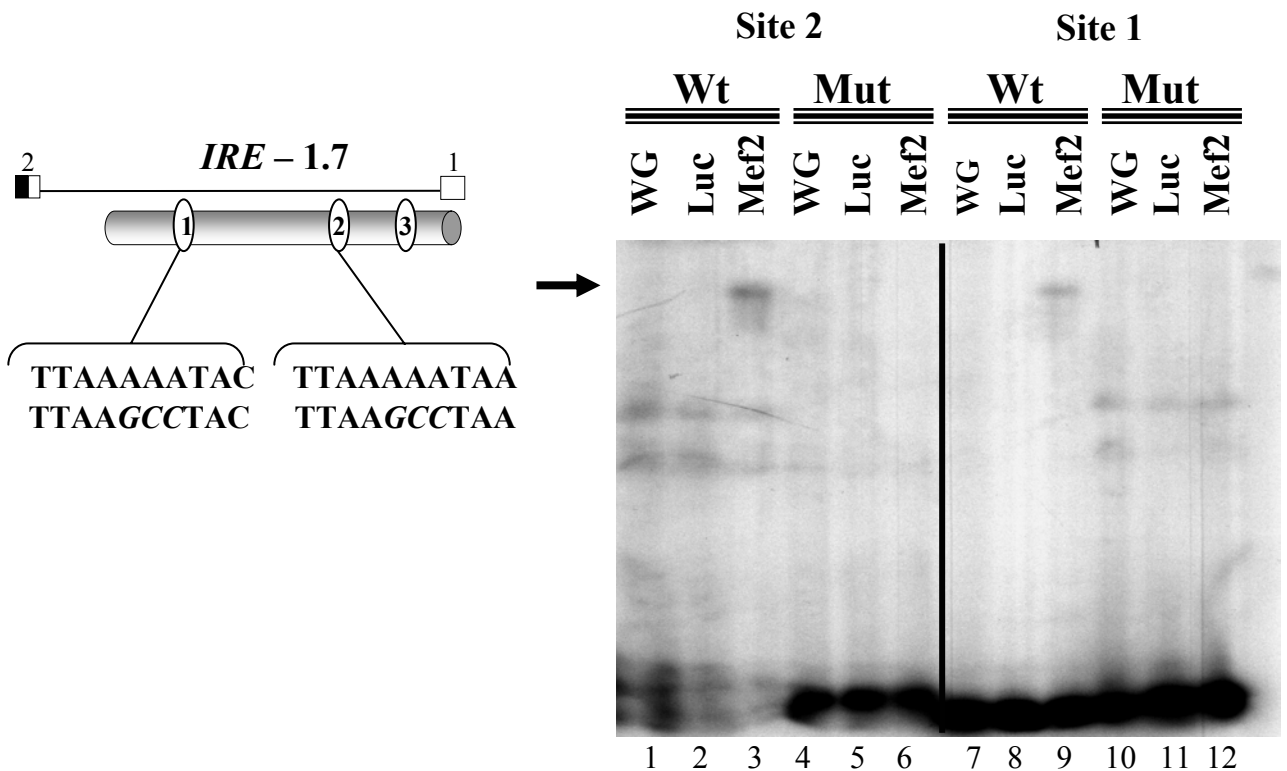

Marín *et al.*

**Figure legend.**- Band shift assays with MEF2 putative binding sites 1 and 2 identified within the IRE fragment. Mutant versions of these sites are shown in italics. Wild type (Wt) and mutant (Mut) oligonucleotides were assayed on Wheat germ extract (WG) in lanes 1, 4, 7 and 10. As a second control, Luciferase protein was assayed in lanes 2, 5, 8 and 11. Finally, MEF2 was tested in lanes 3, 6, 9 and 12. In vitro expression of MEF2 and Luciferase were obtained using “T7-SP6 Coupled Wheat Germ Extract System” (Promega). Note the presence of a retarded band (arrow) in wild type, but not mutated, lanes 3 and 9 corresponding to binding sites 1 and 2.
